# Supplementary material for: Rapid synthesis of nitrogen doped carbon dots and their application as a label free sensor array for simultaneous discrimination of multiple proteins
Source: Royal Society of Chemistry journal article supplement (doi:10.1039/c7tb02129a), 2017-01-01
Supplement: c7tb02129a1.pdf [file c7tb02129a1.pdf]

---

## Supplementary data

---

Proteins

$M_w$ (kDa)

pI

---

### **Rapid synthesis of nitrogen doped carbon dots and their application as label free sensor array for simultaneous discrimination of multiple proteins**

Shenghao Xu<sup>a</sup>, Zhengzhong Su<sup>a</sup>, Zhuo Zhang<sup>b</sup>, Yongyin Nie<sup>a</sup>, Jun Wang<sup>a</sup>, Guanglu Ge<sup>b</sup> and Xiliang Luo<sup>a,\*</sup>

a Key Laboratory of Sensor Analysis of Tumor Marker Ministry of Education, College of Chemistry and Molecular Engineering, Qingdao University of Science and Technology, Qingdao 266042, P. R. China

b CAS Key Laboratory of Standardization and Measurement for Nanotechnology, CAS Center for Excellence in Nanoscience National Center for Nanoscience and Technology Beijing 100190, P. R. China

#### **\*Corresponding author:**

Prof. Dr. Xiliang Luo, Key Laboratory of Sensor Analysis of Tumor Marker Ministry of Education, College of Chemistry and Molecular Engineering, Qingdao University of Science and Technology, Qingdao 266042, P. R. China, **E-mail:** [xiliangluo@qust.edu.cn](mailto:xiliangluo@qust.edu.cn)

---

  

| Proteins | $M_w$ (kDa) | pI |
|----------|-------------|----|
|----------|-------------|----|

---

|                           |       |          |
|---------------------------|-------|----------|
| Pepsin (Pep)              | 35    | 1.0-2.5  |
| Human serum albumin (HSA) | 69.4  | 5.2      |
| Transferrin (Tf)          | 77    | 5.6-6.6  |
| Hemoglobin (Hb)           | 64.5  | 6.8      |
| Catalase (CAT)            | 247.0 | 8.3      |
| Trypsin (Try)             | 24.0  | 10.5     |
| Cytochrome C (Cyt C)      | 12.3  | 10.7     |
| Lysozyme (Lys)            | 14.4  | 9.6-11.0 |

**Table S1** Basic properties of the eight target proteins

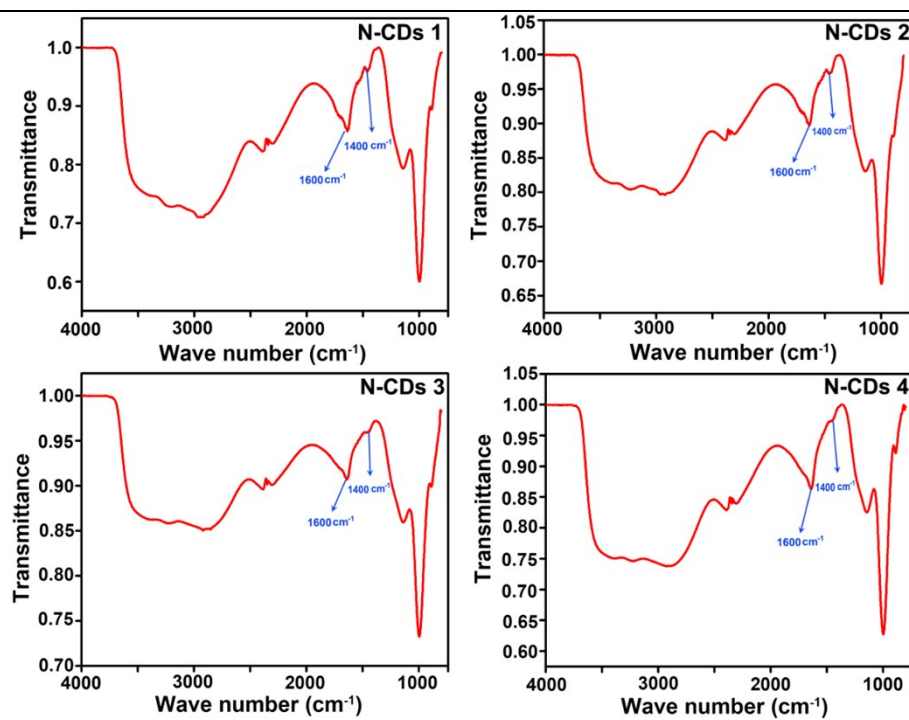

**Fig. S1** FT-IR spectra of these four kinds of N-CDs.

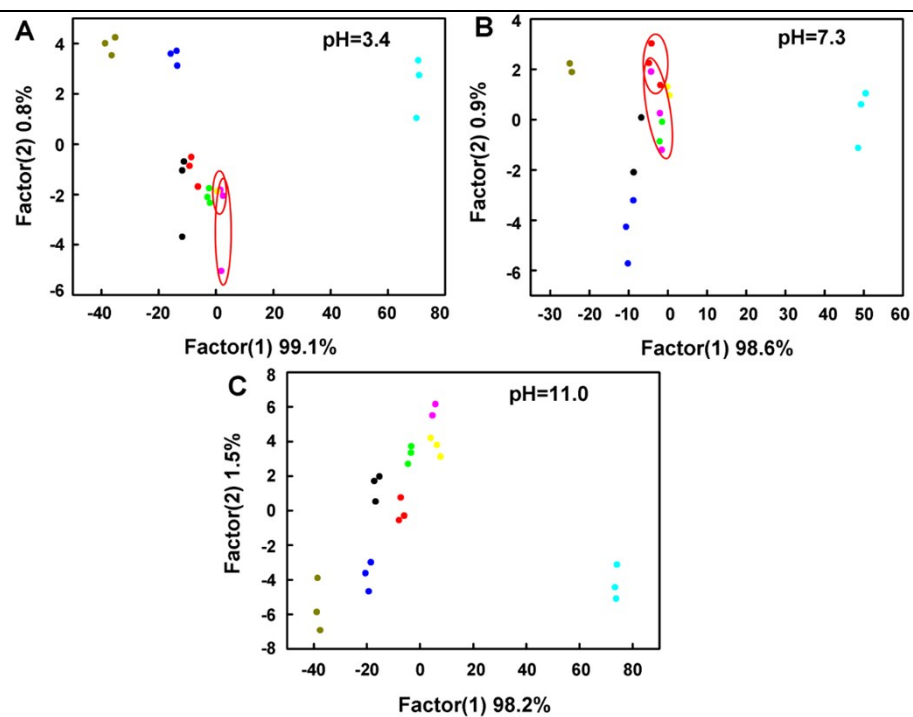

**Fig.S2** The influence of pH value on the protein discrimination.

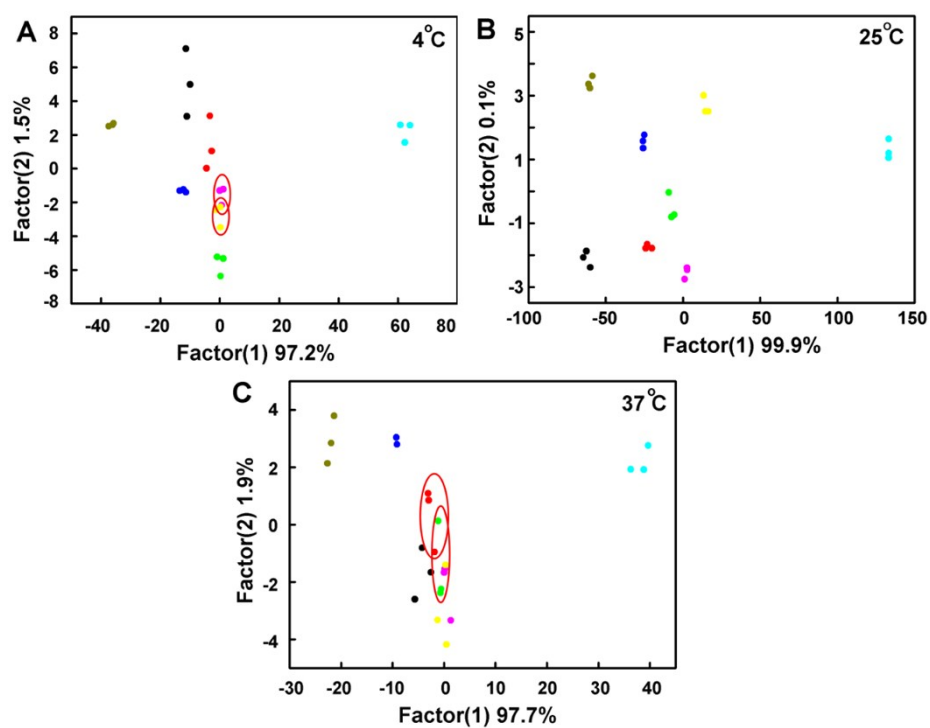

**Fig. S3** The influence of temperature on the protein discrimination.

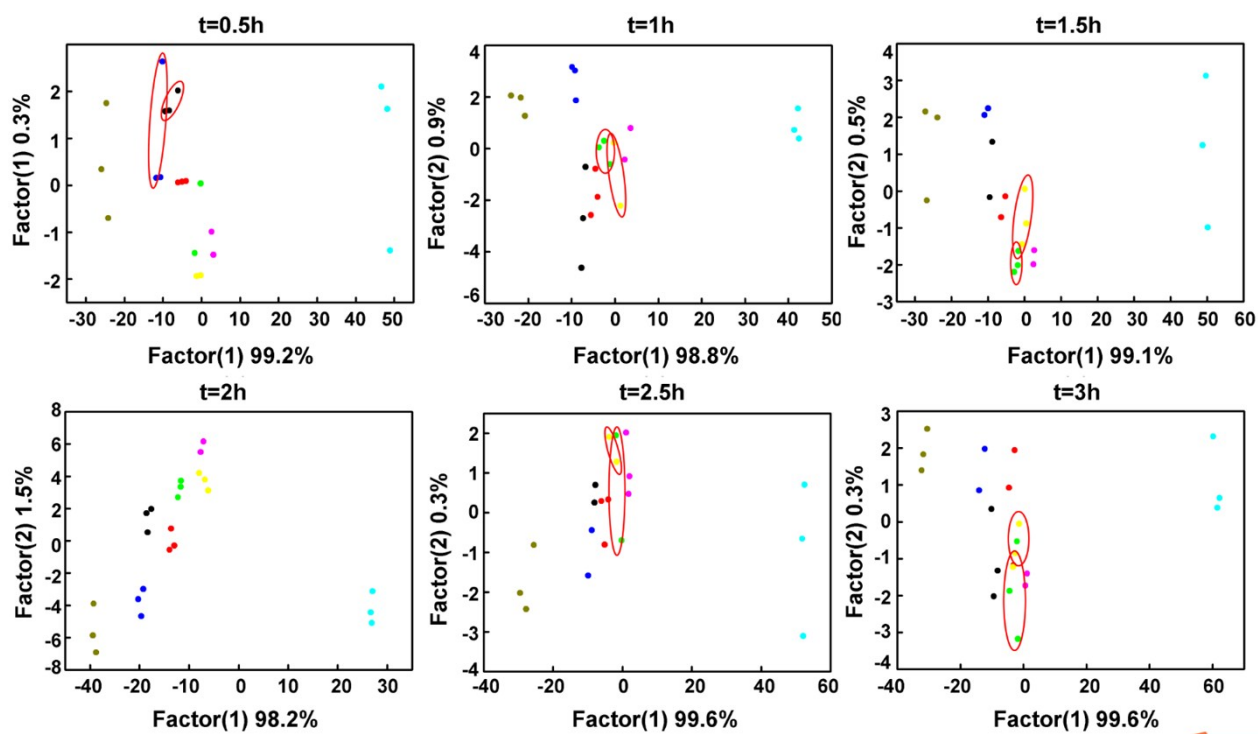

**Fig.S4** The influence of time on the protein discrimination.

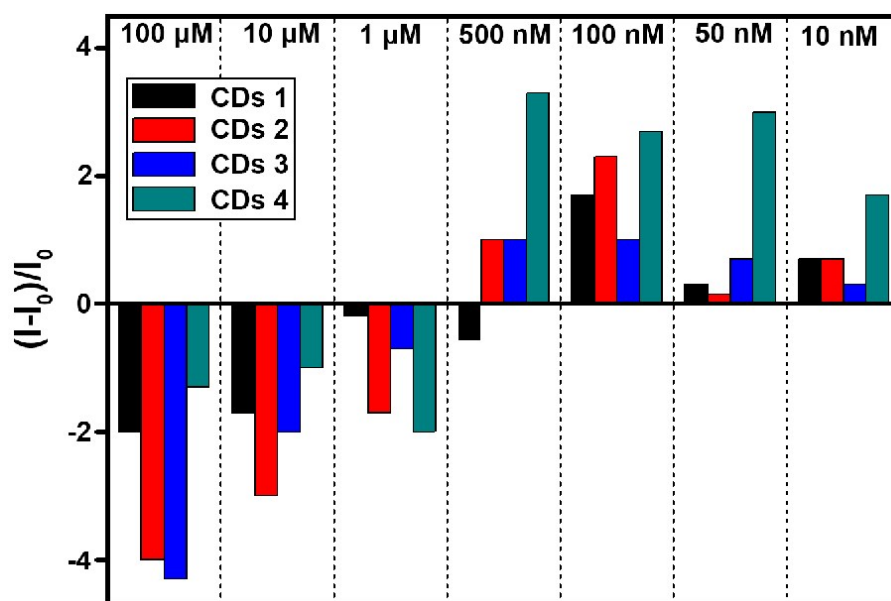

**Fig. S5** Array-based sensing of HSA with different concentrations: Canonical score plot for the fluorescence response obtained from LDA with 95% confidence ellipses.
